# Supplementary material for: A novel approach to CSF pressure measurement via lumbar puncture that shortens the clinical measurement time with a high level of accuracy
Source: Research Square preprint supplement (doi:10.21203/rs.3.rs-1688975/v1), 2023-01-23
Supplement: Supplementary file 1 [file 07b22ee0fb04078ca5aa3658.docx]

| **Needle Type** | **R (cm.s/ml)** | **** (s)** |
| --- | --- | --- |
| Sprotte 24G Atraumatic | 2413,41 | 142,9 |
| Spinocan 22G Quincke | 1421,05 | 66,7 |
| BD 22G Quincke | 1064,04 | 55,6 |
| BD 22G Whitacre | 907,56 | 38,5 |
| Sprotte 22G Atraumatic | 667,7 | 25 |

**Table 3:** Resistances to flow for the spinal needles and time constants calculated for P = 12 cmH2O (From data of the reference paper 14).
