# Supplementary material for: A novel approach to CSF pressure measurement via lumbar puncture that shortens the clinical measurement time with a high level of accuracy
Source: Research Square preprint supplement (doi:10.21203/rs.3.rs-1688975/v1), 2023-01-23
Supplement: Supplementary file 2 [file 4aadf8602430a7e87b9f8bfc.docx]

| **Type of Needle** | **Measurement (M)** | **Total Number of Drops** | **Total Weight of Drops (mg)** | **Measurement Time (s)** | **Flow Rate (cmH2O)** | **R (cm.s/ml)** | **AVG + SD** |
| --- | --- | --- | --- | --- | --- | --- | --- |
| **22G Pajunk Sprotte** | **M1** | 10 | 573,60 | 25,5 | 0,0225 | 667,5 | 667,9 + 0,91 |
| **M2** | 10 | 574,20 | 25,6 | 0,0224 | 668,6 |
| **M3** | 10 | 590,80 | 26,3 | 0,0225 | 667,7 |
| **22G Braun Spinocan** | **M1** | 10 | 549,60 | 51,8 | 0,0106 | 1415,0 | 1411,3 + 3,49 |
| **M2** | 10 | 539,50 | 50,7 | 0,0106 | 1410,8 |
| **M3** | 10 | 554,50 | 52,1 | 0,0107 | 1408,0 |
| **22G M. Schilling** | **M1** | 9 | 480,80 | 32,6 | 0,0147 | 1017,1 | 1028,7 + 11,3 |
| **M2** | 9 | 508,60 | 34,9 | 0,0146 | 1029,3 |
| **M3** | 9 | 507,80 | 35,2 | 0,0144 | 1039,8 |

**Table 1:** Resistance to Flow Measurements
