# Supplementary material for: A novel approach to CSF pressure measurement via lumbar puncture that shortens the clinical measurement time with a high level of accuracy
Source: Research Square preprint supplement (doi:10.21203/rs.3.rs-1688975/v1), 2023-01-23
Supplement: Supplementary file 3 [file 883edb4cde719b7f1e69e2c4.docx]

|  | **22G Pajunk Sprotte** | | | **22G M. Schilling** | | | **22G B Braun Spinocan** | | |
| --- | --- | --- | --- | --- | --- | --- | --- | --- | --- |
| Measurements | M1 | M2 | M3 | M1 | M2 | M3 | M1 | M2 | M3 |
| P (cmH2O) | Time (s) | Time (s) | Time (s) | Time (s) | Time (s) | Time (s) | Time (s) | Time (s) | Time (s) |
| 1 | 7,477 | 7,297 | 7,664 | 11,223 | 11,484 | 11,529 | 13,843 | 13,414 | 14,705 |
| 2 | 15,262 | 15,119 | 15,226 | 23,453 | 23,559 | 23,418 | 29,669 | 29,356 | 30,154 |
| 3 | 23,532 | 23,608 | 23,465 | 36,503 | 36,263 | 36,098 | 46,654 | 46,242 | 47,304 |
| 4 | 32,746 | 32,903 | 32,833 | 50,713 | 50,764 | 50,099 | 65,669 | 64,521 | 64,483 |
| 5 | 42,85 | 43,497 | 43,014 | 66,54 | 66,495 | 66,246 | 86,268 | 84,756 | 84,804 |
| 6 | 54,429 | 54,859 | 54,507 | 84,133 | 84,582 | 83,735 | 109,424 | 107,42 | 107,443 |
| 7 | 67,493 | 67,913 | 67,464 | 103,875 | 104,351 | 103,339 | 135,146 | 132,06 | 132,327 |
| 8 | 82,794 | 83,742 | 82,705 | 126,741 | 127,224 | 125,766 | 164,203 | 161,072 | 161,821 |
| 9 | 99,915 | 101,705 | 100,722 | 153,524 | 154,463 | 152,368 | 199,339 | 195,063 | 196,323 |
| 10 | 121,72 | 123,534 | 120,855 | 182,494 | 186,791 | 183,667 | 242,336 | 234,635 | 236,528 |
| 11 | 149,557 | 152,16 | 149,105 | 225,71 | 227,57 | 223,957 | 296,737 | 286,846 | 288,835 |
| 12 | 188,186 | 191,823 | 187,137 | 280,662 | 282,595 | 277,612 | 369,026 | 354,984 | 359,79 |
| 13 | 254,348 | 262,977 | 251,124 | 365,752 | 368,164 | 360,552 | 486,537 | 456,29 | 469,991 |

**Table 2:** Spinal needles performances under 13 cmH2O pressure.
